# Anatomy Segmentation in Laparoscopic Surgery: Comparison of Machine Learning and Human Expertise

Fiona R. Kolbinger, MD<sup>1,2,3,✉</sup>, Franziska M. Rinner<sup>1</sup>, Alexander C. Jenke<sup>4</sup>, Matthias Carstens<sup>1</sup>, Stefan Leger, PhD<sup>3,4</sup>, Marius Distler, MD<sup>1,2</sup>, Jürgen Weitz, MD<sup>1,2,3,5</sup>, Stefanie Speidel, PhD<sup>3,4,5</sup>, Sebastian Bodenstedt, PhD<sup>4,5,✉</sup>

<sup>1</sup> Department of Visceral, Thoracic and Vascular Surgery, University Hospital and Faculty of Medicine Carl Gustav Carus, Technische Universität Dresden, Fetscherstraße 74, 01307 Dresden, Germany

<sup>2</sup> National Center for Tumor Diseases (NCT/UCC), Dresden, Germany: German Cancer Research Center (DKFZ), Heidelberg, Germany; Faculty of Medicine and University Hospital Carl Gustav Carus, Technische Universität Dresden, Dresden, Germany; Helmholtz-Zentrum Dresden-Rossendorf (HZDR), Fetscherstraße 74, 01307 Dresden, Germany

<sup>3</sup> Else Kröner Fresenius Center for Digital Health (EKfZ), Technische Universität Dresden, Fetscherstraße 74, 01307 Dresden, Germany

<sup>4</sup> Division of Translational Surgical Oncology, National Center for Tumor Diseases (NCT), Partner Site Dresden, Fetscherstraße 74, 01307 Dresden, Germany

<sup>5</sup> Cluster of Excellence "Centre for Tactile Internet with Human-in-the-Loop" (CeTI), Technische Universität Dresden, 01062, Dresden, Germany

✉ Corresponding authors:

Dr. Fiona Kolbinger, Department of Visceral, Thoracic and Vascular Surgery, University Hospital and Faculty of Medicine Carl Gustav Carus, Technische Universität Dresden, Fetscherstraße 74, 01307 Dresden, Germany

☎ +49 (0) 351 458 19624

✉ [fiona.kolbinger@uniklinikum-dresden.de](mailto:fiona.kolbinger@uniklinikum-dresden.de)

Dr. Sebastian Bodenstedt, Division of Translational Surgical Oncology, National Center for Tumor Diseases (NCT/UCC), Partner Site Dresden, Fetscherstrasse 74, 01307 Dresden, Germany

☎ +49 (0) 351 5413

✉ [sebastian.bodenstedt@nct-dresden.de](mailto:sebastian.bodenstedt@nct-dresden.de)

## STRUCTURED ABSTRACT

**Background:** Lack of anatomy recognition represents a clinically relevant risk in abdominal surgery. Machine learning (ML) methods can help identify visible patterns and risk structures, however, their practical value remains largely unclear.

**Materials and Methods:** Based on a novel dataset of 13195 laparoscopic images with pixel-wise segmentations of eleven anatomical structures, we developed specialized segmentation models for each structure and a combined model for all anatomical structures, and compared segmentation performance of both algorithms to a cohort of 28 physicians, medical students, and medical laypersons using the example of pancreas segmentation.

**Results:** Mean Intersection-over-Union for segmentation of intraabdominal structures ranged from 0.28 to 0.83 and from 0.23 to 0.77 for the structure-specific and the combined semantic segmentation model, respectively. At average inference times per model of 28 ms and 71 ms,

45 respectively, both variants are capable of near-real-time operation. Both models outperformed 26  
46 out of 28 human participants in pancreas segmentation.

47 **Conclusions:** These results demonstrate that ML methods have the potential to provide relevant  
48 assistance in anatomy recognition in minimally-invasive surgery in near-real-time. Future research  
49 should investigate the educational value and subsequent clinical impact of respective assistance  
50 systems.

51

## 52 **HIGHLIGHTS**

- 53 • Based on a novel large-scale dataset of 13195 laparoscopic images, two machine learning  
54 models were developed for automated identification and delineation of 11 anatomical  
55 structures: One model for each structure (abdominal wall, colon, intestinal vessels (inferior  
56 mesenteric artery and inferior mesenteric vein with their subsidiary vessels), liver,  
57 pancreas, small intestine, spleen, stomach, ureter and vesicular glands) and a combined  
58 model for all structures.
- 59 • The structure-specific and combined segmentation models demonstrated similar  
60 performance in identifying intraabdominal structures and can operate in near-real-time.
- 61 • Both models outperformed 26 out of 28 human participants in pancreas segmentation,  
62 demonstrating their potential for real-time assistance in recognizing anatomical landmarks  
63 during minimally-invasive surgery.

64

## 65 **KEYWORDS**

66 Minimally-invasive surgery, laparoscopy, surgical data science, surgical anatomy, surgical  
67 innovation, artificial intelligence

68

## 69 INTRODUCTION

70 Computer vision describes the computerized analysis of digital images aiming at the automation  
71 of human visual capabilities, most commonly using machine learning methods, in particular deep  
72 learning. This approach has transformed medicine in recent years, with successful applications  
73 including computer-aided diagnosis of colonic polyp dignity in endoscopy<sup>1,2</sup>, detection of clinically  
74 actionable genetic alterations in histopathology<sup>3</sup>, and melanoma detection in dermatology<sup>4</sup>.  
75 Availability of large amounts of training data is the defining prerequisite for successful application  
76 of deep learning methods. With the establishment of laparoscopy as the gold standard for a variety  
77 of surgical procedures<sup>5-8</sup> and the increasing availability of computing resources, these concepts  
78 have gradually been applied to abdominal surgery. The overwhelming majority of research efforts  
79 in the field of Artificial Intelligence (AI)-based analysis of intraoperative surgical imaging data (i.e.  
80 video data from laparoscopic or open surgeries) has focused on classifying images with respect  
81 to the presence and/or location of previously annotated surgical instruments or anatomical  
82 structures<sup>9-13</sup> or on analysis of surgical proficiency<sup>14-16</sup> based on recorded procedures. However,  
83 almost all research endeavors in the field of computer vision in laparoscopic surgery have  
84 concentrated on preclinical stages and to date, no AI model based on intraoperative surgical  
85 imaging data could demonstrate a palpable clinical benefit.<sup>17,18</sup> Among the studies closest to  
86 clinical application are recent works on identification of instruments and hepatobiliary anatomy  
87 during cholecystectomy for automated assessment of the critical view of safety<sup>13</sup>, and on the  
88 automated segmentation of safe and unsafe preparation zones during cholecystectomy<sup>19</sup>.  
89 In surgery, patient outcome heavily depends on experience and performance of the surgical  
90 team.<sup>20,21</sup> In a recent analysis of Human Performance Deficiencies in major cardiothoracic,  
91 vascular, abdominal transplant, surgical oncology, acute care, and general surgical operations,  
92 more than half of the cases with postoperative complications were associated with identifiable  
93 human error. Among these errors, lack of recognition (including misidentified anatomy) accounted  
94 for 18.8%, making it the most common Human Performance Deficiency overall.<sup>22</sup> While AI-based  
95 systems identifying anatomical risk and target structures would theoretically have the potential to  
96 alleviate this risk, limited availability and diversity of (annotated) laparoscopic image data  
97 drastically restrict the clinical potential of such applications in practice.  
98 To advance and diversify the applications of computer vision in laparoscopic surgery, we have  
99 recently published the Dresden Surgical Anatomy Dataset<sup>23</sup>, providing 13195 laparoscopic images  
100 with high-quality annotations of the presence and exact location of eleven intraabdominal  
101 anatomical structures: abdominal wall, colon, intestinal vessels (inferior mesenteric artery and  
102 inferior mesenteric vein with their subsidiary vessels), liver, pancreas, small intestine, spleen,  
103 stomach, ureter and vesicular glands. Here, we present the first study evaluating automated

104 detection and localization of organs and anatomical structures in laparoscopic view based on this  
105 dataset, and, using the example of delineation of the pancreas, compare algorithm performance  
106 to that of humans.

107

## 108 **METHODS**

### 109 ***Patient cohort***

110 Video data from 32 robot-assisted anterior rectal resections or rectal extirpations were gathered  
111 at the University Hospital Carl Gustav Carus Dresden between February 2019 and February 2021.  
112 All included patients had a clinical indication for the surgical procedure, recommended by an  
113 interdisciplinary tumor board. The procedures were performed using the da Vinci® Xi system  
114 (Intuitive Surgical, Sunnyvale, CA, USA) with a standard Da Vinci® Xi/X Endoscope with Camera  
115 (8 mm diameter, 30° angle, Intuitive Surgical, Sunnyvale, CA, USA, Item code 470057). Surgeries  
116 were recorded using the CAST system (Orpheus Medical GmbH, Frankfurt a.M., Germany). Each  
117 record was saved at a resolution of 1920 x 1080 pixels in MPEG-4 format.

118 All experiments were performed in accordance with the ethical standards of the Declaration of  
119 Helsinki and its later amendments. The local Institutional Review Board (ethics committee at the  
120 Technical University Dresden) reviewed and approved this study (approval number: BO-EK-  
121 137042018). The trial was registered on clinicaltrials.gov (trial registration ID: NCT05268432).  
122 Written informed consent to laparoscopic image data acquisition, data annotation, data analysis,  
123 and anonymized data publication was obtained from all participants. Before publication, all data  
124 was anonymized according to the general data protection regulation of the European Union.

### 125 ***Dataset***

126 Based on the full-length surgery recordings and respective temporal annotations of organ visibility,  
127 individual image frames were extracted and annotated as described previously.<sup>23</sup> The resulting  
128 Dresden Surgical Anatomy Dataset comprises 13195 distinct images with pixel-wise  
129 segmentations of eleven anatomical structures: abdominal wall, colon, intestinal vessels (inferior  
130 mesenteric artery and inferior mesenteric vein with their subsidiary vessels), liver, pancreas, small  
131 intestine, spleen, stomach, ureter and vesicular glands. Moreover, the dataset comprises binary  
132 annotations of the presence of each of these organs for each image. The dataset is publicly  
133 available via the following link: <https://doi.org/10.6084/m9.figshare.21702600>.

134

135 For machine learning purposes, the Dresden Surgical Anatomy Dataset was split into training,  
136 validation, and test data as follows (Figure 1):

- 137 — Training set (at least 12 surgeries per anatomical structure): surgeries 1, 4, 5, 6, 8, 9, 10,  
138 12, 15, 16, 17, 19, 22, 23, 24, 25, 27, 28, 29, 30, 31.  
139 — Validation set (3 surgeries per anatomical structure): surgeries 3, 21, 26.  
140 — Test set (5 surgeries per anatomical structure): surgeries 2, 7, 11, 13, 14, 18, 20, 32.  
141

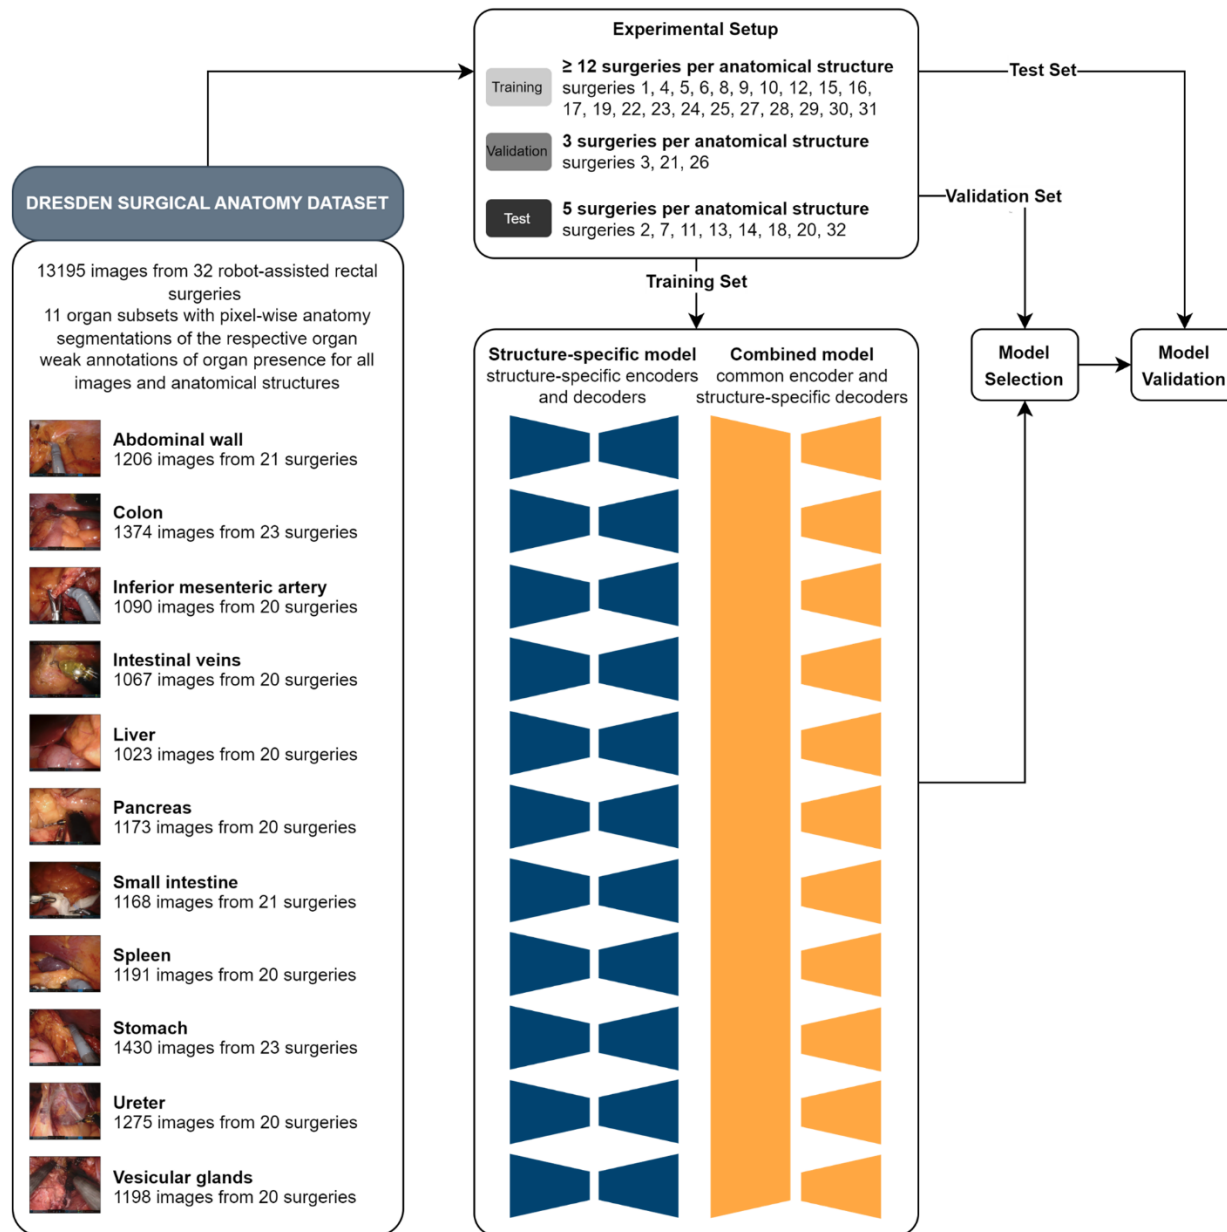

142 **Figure 1: Schematic illustration of the structure-specific and combined machine learning models used for**  
143 **semantic segmentation.** The Dresden Surgical Anatomy Dataset was split into a training, a validation, and a test set.  
144 For spatial segmentation, two machine learning models were trained: A structure-specific model with individual encoders  
145 and decoders, and a combined model with a common encoder and structure-specific decoders.  
146  
147

148 This split is proposed for future works using the Dresden Surgical Anatomy Dataset to reproduce  
149 the variance of the entire dataset within each subset, and to ensure comparability regarding clinical  
150 variables between the training, the validation, and the test set. Surgeries for the test set were

151 selected to minimize variance regarding the number of frames over the segmented classes. Out  
152 of the remaining surgeries, the validation set was separated from the training set using the same  
153 criterion.

154

### 155 ***Structure-specific semantic segmentation model***

156 To segment each anatomical structure, a separate convolutional neural network for segmentation  
157 a DeeplabV3<sup>24</sup> model with a ResNet50 backbone with default PyTorch pretraining on the COCO  
158 dataset<sup>25</sup>, was used. The networks were trained using cross-entropy loss and the AdamW  
159 optimizer<sup>26</sup> for 100 epochs with a starting learning rate of  $10^{-4}$  and a linear learning rate scheduler  
160 decreasing the learning rate by 0.9 every 10 epochs. For data augmentation, we applied random  
161 scaling and rotation, as well as brightness adjustments. The final model for each organ was  
162 selected via the Intersection-over-Union (IoU) on the validation dataset and evaluated using the  
163 Dresden Surgical Anatomy Dataset with the abovementioned training-validation-test split (Figure  
164 1).

165 Segmentation performance was assessed using F1 score, IoU, precision, recall, and specificity  
166 on the test folds. These parameters are commonly used technical measures of prediction  
167 exactness, ranging from 0 (least exact prediction) to 1 (entirely correct prediction without any  
168 misprediction).

169

### 170 ***Combined semantic segmentation model***

171 A convolutional neural network with a common encoder and eleven decoders for combined  
172 segmentation of the eleven anatomical structures was trained. The used architecture is an  
173 extension of DeepLabV3<sup>24</sup>. A shared ResNet50 backbone with default PyTorch pretraining on the  
174 COCO dataset<sup>25</sup>, was used. For each class, a DeepLabV3 decoder was then run on the features  
175 extracted from a given image by the backbone. As the images are only annotated for binary  
176 classes, the loss is only calculated for every pixel in images, in which the structure associated with  
177 the current decoder is annotated. For images, in which the associated class is not annotated, only  
178 the pixels that are annotated as belonging to another class are included in the loss, e.g., pixels  
179 that were annotated as belonging to the class "liver" can be used as negative examples for the  
180 class "pancreas". The remaining training procedure was identical to the structure-specific model.

181 The model was trained and evaluated using the Dresden Surgical Anatomy Dataset with the  
182 abovementioned training-validation-test split (Figure 1).  
183 Segmentation performance was assessed using F1 score, IoU, precision, recall, and specificity  
184 on the test folds.



185

186 ***Comparative evaluation of algorithmic and human performance***

187 To determine the clinical potential of automated segmentation of anatomical risk structures, the  
188 segmentation performance of 28 humans was compared to that of the structure-specific and the  
189 combined semantic segmentation models using the example of the pancreas. The local  
190 Institutional Review Board (ethics committee at the Technical University Dresden) reviewed and  
191 approved this study (approval number: BO-EK-566122021). All participants provided written  
192 informed consent to anonymous study participation, data acquisition and analysis, and publication.  
193 In total, 28 participants (physician and non-physician medical staff, medical students, and medical  
194 laypersons) marked the pancreas in 35 images from the Dresden Surgical Anatomy Dataset<sup>23</sup> with  
195 bounding boxes. These images originated from 26 different surgeries, and the pancreas was  
196 visible in 16 of the 35 images. Each of the previously selected 35 images was shown once, the  
197 order being arbitrarily chosen but identical for all participants. The open-source annotation  
198 software Computer Vision Annotation Tool (CVAT) was used for annotations. In cases where the  
199 pancreas was seen in multiple, non-connected locations in the image, participants were asked to  
200 create separate bounding boxes for each area.

201 Based on the structure-specific and the combined semantic segmentation models, axis-aligned  
202 bounding boxes marking the pancreas were generated in the 35 images from the pixel-wise  
203 segmentation. To guarantee that the respective images were not part of the training data, four-  
204 fold cross validation was used, i.e., the origin surgeries were split into four equal-sized batches,  
205 and algorithms were trained on three batches that did not contain the respective origin image  
206 before being applied to segmentation.

207 To compare human and algorithm performance, the bounding boxes created by each participant  
208 and the structure-specific as well as the combined semantic segmentation models were compared  
209 to bounding boxes derived from the Dresden Surgical Anatomy Dataset, which were defined as  
210 ground truth. IoU between the manual or automatic bounding box and the ground truth was used  
211 to compare segmentation accuracy.

212

213 **DATA AND CODE AVAILABILITY**

214 ***Data Availability***

215 The Dresden Surgical Anatomy Dataset is publicly available via the following link:  
216 <https://doi.org/10.6084/m9.figshare.21702600>. All other data generated and analyzed during the

217 current study are available from the corresponding authors on reasonable request. To gain  
218 access, data requestors will need to sign a data access agreement.

219

## 220 **Code Availability**

221 The most relevant scripts used for dataset compilation are publicly available via the following link:  
222 <https://zenodo.org/record/6958337#.YzsBdnZBzOg>. The code used for segmentation algorithms  
223 is available at [https://gitlab.com/nct\\_tso\\_public/anatomy-recognition-dsad](https://gitlab.com/nct_tso_public/anatomy-recognition-dsad).

224

## 225 **RESULTS**

### 226 ***Machine Learning-based anatomical structure segmentation in structure-specific models***

227 Structure-specific multi-layer convolutional neural networks (Figure 1) were trained to segment  
228 the abdominal wall, the colon, intestinal vessels (inferior mesenteric artery and inferior mesenteric  
229 vein with their subsidiary vessels), the liver, the pancreas, the small intestine, the spleen, the  
230 stomach, the ureter, and vesicular glands (Supplementary Table 1). Table 1 displays mean F1  
231 score, IoU, precision, recall, and specificity for individual anatomical structures as predicted by the  
232 structure-specific algorithms on the test data.

233 Out of the analyzed segmentation models, performance was lowest for vesicular glands (mean  
234 IoU:  $0.28 \pm 0.21$ ), the pancreas (mean IoU:  $0.28 \pm 0.27$ ), and the ureter (mean IoU:  $0.36 \pm 0.25$ ),  
235 while excellent predictions were achieved for the abdominal wall (mean IoU:  $0.83 \pm 0.14$ ) and the  
236 small intestine (mean IoU:  $0.80 \pm 0.18$ ). In segmentation of the pancreas, the ureter, vesicular  
237 glands and intestinal vessel structures, there was a relevant proportion of images with no detection  
238 or no overlap between ground truth, while for all remaining anatomical structures, this proportion  
239 was minimal (Figure 2 a). While the images, in which the highest IoUs were observed, mostly  
240 displayed large organ segments that were clearly visible (Figure 2 b), the images with the lowest  
241 IoU were of variable quality with confounding factors such as blood, smoke, soiling of the  
242 endoscope lens, or pictures blurred by camera shake (Figure 2 c).

243



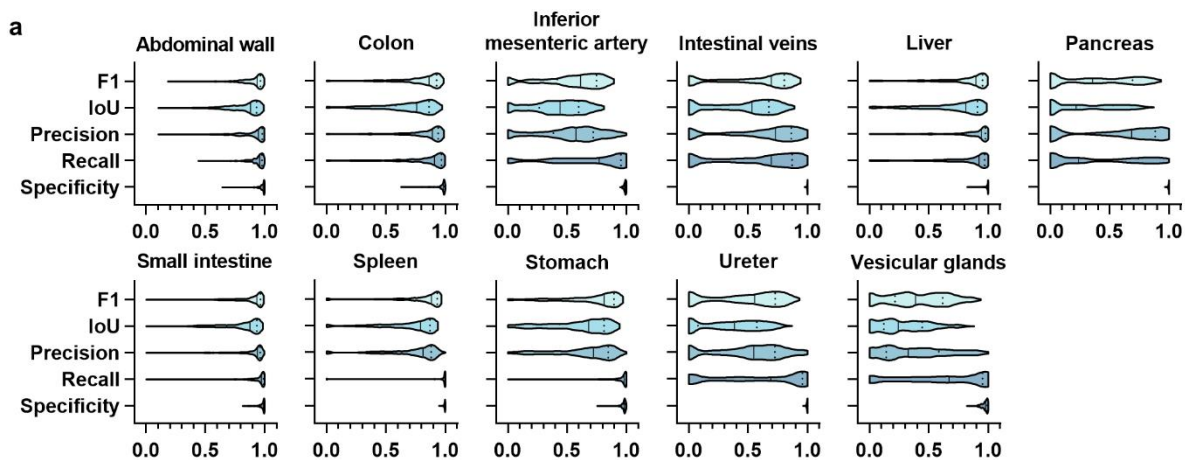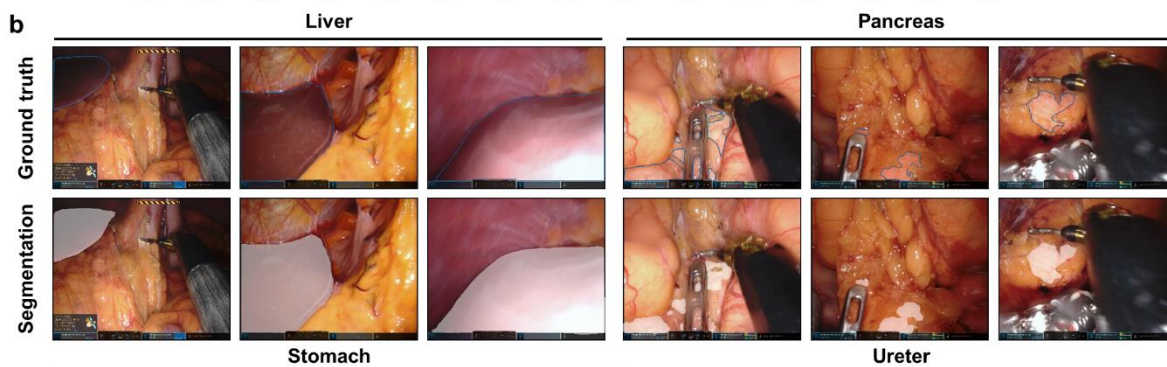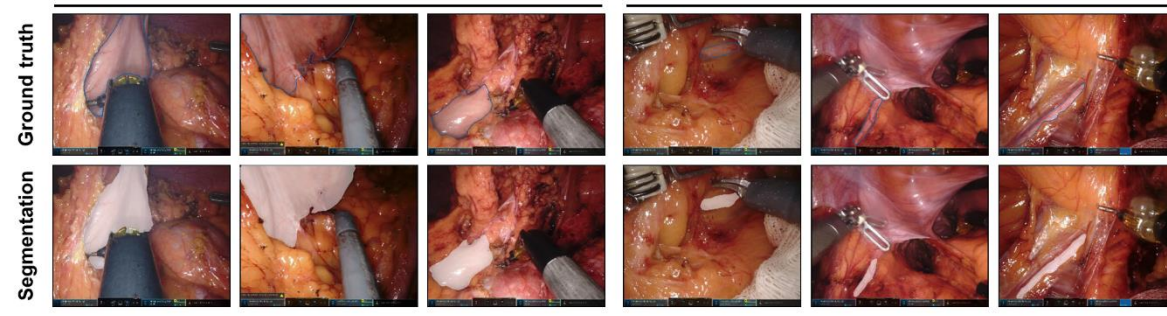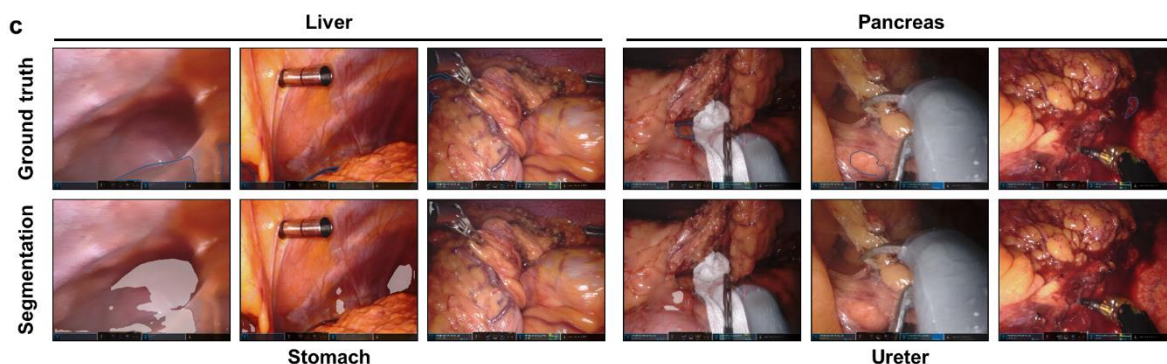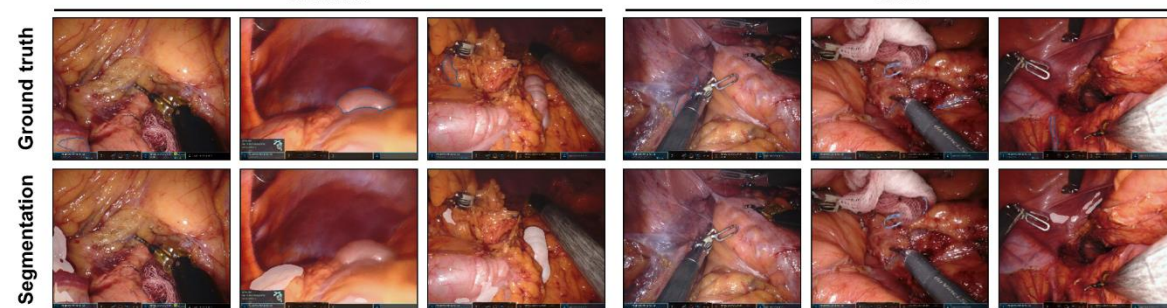

245 **Figure 2: Pixel-wise organ segmentation with structure-specific models trained on the respective organ subsets**  
246 **of the Dresden Surgical Anatomy Dataset. (a)** Violin plot illustrations of performance metrics for structure-specific  
247 segmentation models on the test dataset. The median and quartiles are illustrated as solid and dashed lines,  
248 respectively. **(b)** Example images from the test dataset with the highest IoUs for liver, pancreas, stomach, and ureter  
249 segmentation with structure-specific segmentation models. Ground truth is displayed as blue line (upper panel), model  
250 segmentations are displayed as white overlay (lower panel). **(c)** Example images from the test dataset with the lowest  
251 IoUs for liver, pancreas, stomach, and ureter segmentation with structure-specific segmentation models. Ground truth  
252 is displayed as blue line (upper panel), model segmentations are displayed as white overlay (lower panel).  
253

254 Inference on a single image with a resolution of 640 x 512 pixels required, on average, 28 ms on  
255 an Nvidia A5000, resulting in a frame rate of almost 36 frames per second. This runtime includes  
256 one decoder, meaning that only the segmentation for one anatomical class is included.

257  
258 **Table 1: Summary of performance metrics for anatomical structure segmentation using structure-specific**  
259 **models based on the DeepLabv3 architecture on the test dataset.** For each metric, mean and standard deviation  
260 are displayed.  
261

| Anatomical structure       | F1 score    | IoU         | Precision   | Recall      | Specificity |
|----------------------------|-------------|-------------|-------------|-------------|-------------|
| Abdominal wall             | 0.90 ± 0.10 | 0.83 ± 0.14 | 0.89 ± 0.14 | 0.93 ± 0.07 | 0.97 ± 0.04 |
| Colon                      | 0.79 ± 0.20 | 0.69 ± 0.22 | 0.80 ± 0.21 | 0.82 ± 0.21 | 0.97 ± 0.05 |
| Inferior mesenteric artery | 0.54 ± 0.26 | 0.41 ± 0.22 | 0.55 ± 0.25 | 0.67 ± 0.33 | 0.99 ± 0.01 |
| Intestinal veins           | 0.54 ± 0.33 | 0.44 ± 0.29 | 0.70 ± 0.26 | 0.56 ± 0.36 | 1.00 ± 0.00 |
| Liver                      | 0.80 ± 0.23 | 0.71 ± 0.25 | 0.85 ± 0.21 | 0.81 ± 0.24 | 0.98 ± 0.03 |
| Pancreas                   | 0.37 ± 0.32 | 0.28 ± 0.27 | 0.59 ± 0.37 | 0.37 ± 0.36 | 1.00 ± 0.01 |
| Small intestine            | 0.87 ± 0.14 | 0.80 ± 0.18 | 0.87 ± 0.16 | 0.91 ± 0.15 | 0.97 ± 0.04 |
| Spleen                     | 0.79 ± 0.23 | 0.69 ± 0.24 | 0.74 ± 0.22 | 0.90 ± 0.24 | 0.99 ± 0.01 |
| Stomach                    | 0.71 ± 0.24 | 0.60 ± 0.25 | 0.65 ± 0.25 | 0.89 ± 0.21 | 0.98 ± 0.02 |
| Ureter                     | 0.47 ± 0.30 | 0.36 ± 0.25 | 0.53 ± 0.28 | 0.57 ± 0.39 | 1.00 ± 0.00 |
| Vesicular glands           | 0.40 ± 0.25 | 0.28 ± 0.21 | 0.37 ± 0.28 | 0.62 ± 0.35 | 0.97 ± 0.03 |

262  
263 ***Machine Learning-based anatomical structure segmentation in a combined model***  
264 Using annotated images from the Dresden Surgical Anatomy Dataset across anatomical structure  
265 classes, a combined model with a mutual encoder and organ-specific decoders was trained  
266 (Figure 1, Supplementary Table 2). Table 2 displays mean F1 score, IoU, precision, recall, and  
267 specificity for anatomical structure segmentation in the combined model.  
268



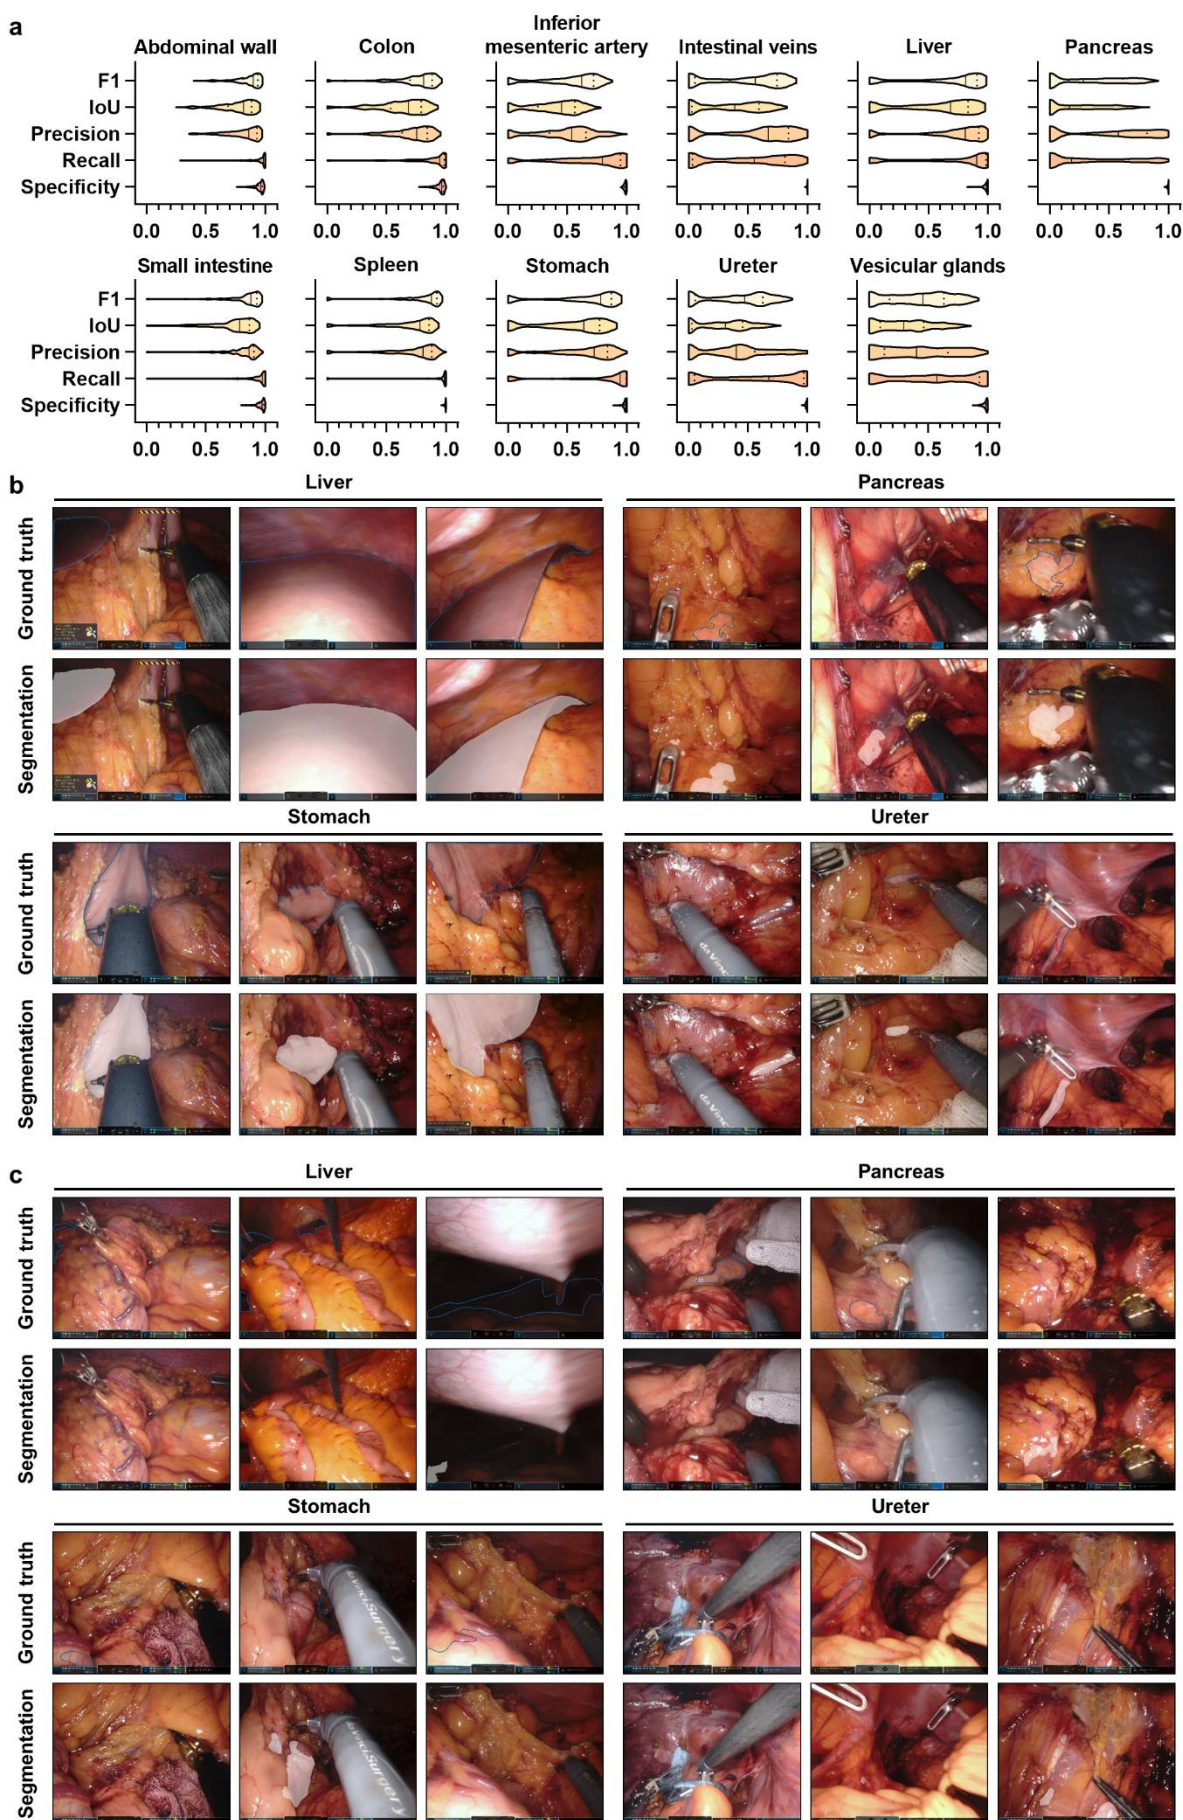

270 **Figure 3: Pixel-wise organ segmentation with the combined model trained on the Dresden Surgical Anatomy**  
271 **Dataset across anatomical structure classes with a common encoder and structure-specific decoders. (a)** Violin  
272 plot illustrations of performance metrics for the combined segmentation model on the test dataset. The median and  
273 quartiles are illustrated as solid and dashed lines, respectively. **(b)** Example images from the test dataset with the  
274 highest IoUs for liver, pancreas, stomach, and ureter segmentation with the combined segmentation model. Ground  
275 truth is displayed as blue line (upper panel), model segmentations are displayed as white overlay (lower panel). **(c)**  
276 Example images from the test dataset with the lowest IoUs for liver, pancreas, stomach, and ureter segmentation with  
277 the combined segmentation model. Ground truth is displayed as blue line (upper panel), model segmentations are  
278 displayed as white overlay (lower panel).  
279

280 The performance of the combined model was overall similar to that of structure-specific models  
281 (Table 1), with highest segmentation performance for the abdominal wall (mean IoU:  $0.77 \pm 0.15$ )  
282 and the small intestine (mean IoU:  $0.72 \pm 0.21$ ), and the lowest performance for the pancreas  
283 (mean IoU:  $0.23 \pm 0.29$ ), the ureter (IoU:  $0.29 \pm 0.22$ ) and vesicular glands (IoU:  $0.30 \pm 0.23$ ). In  
284 comparison to the respective structure-specific models, the combined model performed notably  
285 weaker in liver segmentation, while performance for the other anatomical structures was similar.  
286 The proportion of un- or entirely mispredicted images was largest in the ureter, the pancreas, the  
287 stomach, the abdominal vessel structures, and the vesicular glands (Figure 3 a). Similar to the  
288 structure-specific models, trends towards an impact of segment size, uncommon angles of vision,  
289 endoscope lens soiling, blurry images, and presence of blood or smoke were seen when  
290 comparing image quality of well-predicted images (Figure 3 b) to images with poor or no prediction  
291 (Figure 3 c).  
292

293 **Table 2: Summary of performance metrics for anatomical structure segmentation using the combined model**  
294 **(common encoder with structure-specific decoders) on the test dataset.** For each metric, mean and standard  
295 deviation are displayed.  
296

| Anatomical structure       | F1 score        | IoU             | Precision       | Recall          | Specificity     |
|----------------------------|-----------------|-----------------|-----------------|-----------------|-----------------|
| Abdominal wall             | $0.86 \pm 0.11$ | $0.77 \pm 0.15$ | $0.81 \pm 0.15$ | $0.95 \pm 0.09$ | $0.95 \pm 0.04$ |
| Colon                      | $0.75 \pm 0.19$ | $0.63 \pm 0.21$ | $0.71 \pm 0.18$ | $0.84 \pm 0.23$ | $0.95 \pm 0.04$ |
| Inferior mesenteric artery | $0.53 \pm 0.25$ | $0.40 \pm 0.21$ | $0.52 \pm 0.22$ | $0.68 \pm 0.32$ | $0.99 \pm 0.01$ |
| Intestinal veins           | $0.46 \pm 0.32$ | $0.35 \pm 0.27$ | $0.70 \pm 0.23$ | $0.48 \pm 0.36$ | $1.00 \pm 0.00$ |
| Liver                      | $0.65 \pm 0.34$ | $0.57 \pm 0.33$ | $0.76 \pm 0.23$ | $0.69 \pm 0.38$ | $0.98 \pm 0.03$ |
| Pancreas                   | $0.32 \pm 0.30$ | $0.23 \pm 0.24$ | $0.61 \pm 0.33$ | $0.32 \pm 0.35$ | $0.99 \pm 0.01$ |
| Small intestine            | $0.81 \pm 0.19$ | $0.72 \pm 0.21$ | $0.81 \pm 0.17$ | $0.87 \pm 0.23$ | $0.96 \pm 0.03$ |
| Spleen                     | $0.78 \pm 0.24$ | $0.69 \pm 0.24$ | $0.76 \pm 0.18$ | $0.89 \pm 0.26$ | $0.99 \pm 0.01$ |
| Stomach                    | $0.63 \pm 0.32$ | $0.53 \pm 0.29$ | $0.68 \pm 0.23$ | $0.74 \pm 0.37$ | $0.98 \pm 0.02$ |
| Ureter                     | $0.40 \pm 0.28$ | $0.29 \pm 0.22$ | $0.44 \pm 0.27$ | $0.56 \pm 0.40$ | $0.99 \pm 0.01$ |
| Vesicular glands           | $0.42 \pm 0.27$ | $0.30 \pm 0.23$ | $0.41 \pm 0.30$ | $0.56 \pm 0.36$ | $0.98 \pm 0.02$ |

297  
298  
299 Inference on a single image with a resolution of 640 x 512 pixels required, on average, 71 ms on  
300 an Nvidia A5000, resulting in a frame rate of about 14 frames per second. This runtime includes  
301 all 11 decoders, meaning that segmentations for all organ classes are included.  
302

### 303 **Performance of machine learning models in relation to human performance**

304 To approximate the clinical value of the previously described algorithms for anatomical structure  
305 segmentation, the performances of the structure-specific and the combined model were compared  
306 to that of a cohort of 28 physicians, medical students, and persons with no medical background  
307 (Figure 4 a), and different degrees of experience in laparoscopic surgery (Figure 4 b). A vulnerable  
308 anatomical structure with – measured by classical metrics of overlap (Tables 1 and 2) –  
309 comparably weak segmentation performance of the trained algorithms, the pancreas was selected  
310 as an example.

311 Comparing bounding box segmentations of the pancreas of human annotators, the medical and  
312 laparoscopy-specific experience of participants was mirrored by the respective IoUs describing  
313 the overlap between the pancreas annotation and the ground truth. The pancreas-specific  
314 segmentation model (IoU: 0.29) and the combined segmentation model (IoU: 0.21) outperformed  
315 26 out of the 28 human participants (Figures 4 c and d). Overall, these results demonstrate that  
316 the developed models have clinical potential to improve the recognition of vulnerable anatomical  
317 structures in laparoscopy.

318

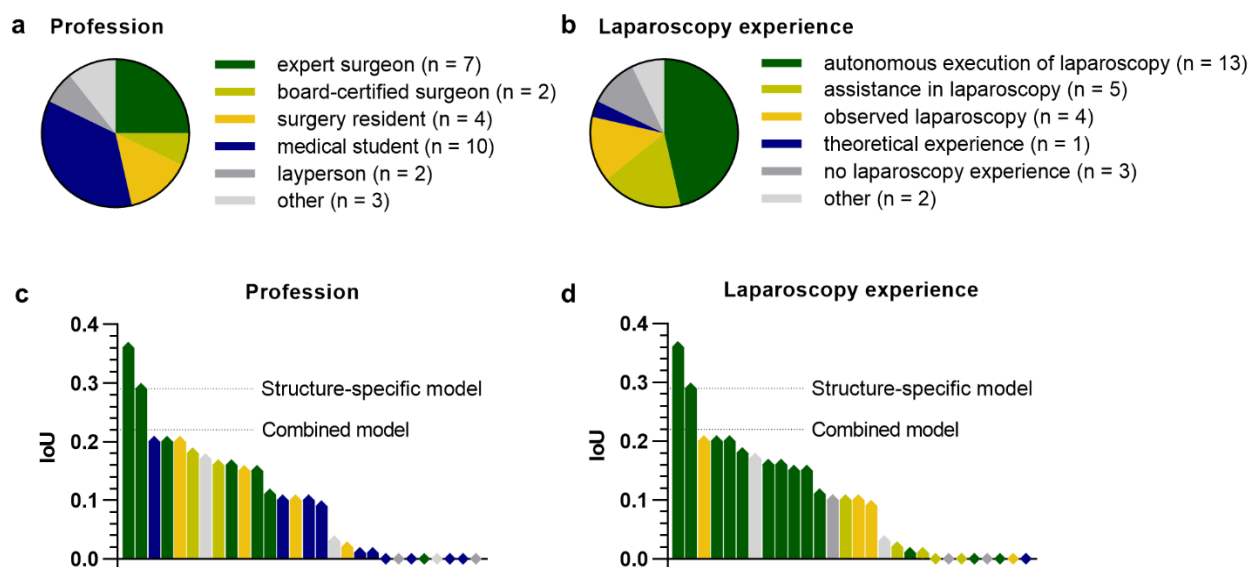

319 **Figure 4: Comparison of pancreas segmentation performance of the structure-specific and the combined**  
320 **semantic segmentation models with a cohort of 28 human participants. (a)** Distribution of medical and non-medical  
321 **professions among human participants. (b)** Distribution of laparoscopy experience among human participants. **(c)**  
322 **Waterfall chart displaying the average pancreas segmentation IoUs of participants with different professions as**  
323 **compared to the IoU generated by the structure-specific and the combined semantic segmentation models. (d)**  
324 **Waterfall chart displaying the average pancreas segmentation IoUs of participants with varying laparoscopy experience as**  
325 **compared to the IoU generated by the structure-specific and the combined semantic segmentation models.**  
326  
327



## 328 DISCUSSION

329 In surgery, misinterpretation of visual cues can result in objectifiable errors with serious  
330 consequences.<sup>22</sup> Based on a robust public dataset providing 13195 laparoscopic images with  
331 segmentations of eleven intra-abdominal anatomical structures, this study explores the potential  
332 of machine learning for automated segmentation of these organs, and compares algorithmic  
333 segmentation quality to that of humans with varying experience in minimally-invasive abdominal  
334 surgery.

335 In summary, the presented findings suggest that machine learning-based segmentation of  
336 intraabdominal organs and anatomical structures is possible and has the potential to provide  
337 clinically valuable information. At an average runtime of 71 ms per image, corresponding to a  
338 frame rate of 14 frames per second, the combined model would facilitate near-real-time  
339 identification of eleven anatomical structures. These runtimes mirror the performance of a non-  
340 optimized version of the model, which can be significantly improved using methods such as  
341 TensorRT from Nvidia. Measured by classical metrics of overlap between segmentation and  
342 ground truth, predictions were, overall, better for large and similar-appearing organs such as the  
343 abdominal wall, the liver, the stomach, and the spleen as compared to smaller and more diverse-  
344 appearing organs such as the pancreas, the ureter, or vesicular glands. Furthermore, poor image  
345 quality (i.e., images blurred by camera movements, presence of blood or smoke in images) was  
346 linked to lower accuracy of machine learning-based segmentations. These findings imply that  
347 computer vision studies in laparoscopy should be carefully interpreted taking representativity and  
348 potential selection of underlying training and validation data into consideration.

349 Measured by classical metrics of overlap (e.g., IoU, F1 score, precision, recall, specificity) that are  
350 commonly used to evaluate segmentation performance, the structure-specific models and the  
351 combined model performed similarly for most anatomical structures with average IoUs ranging  
352 from 0.28 to 0.83 and from 0.23 to 0.77, respectively. The structure-specific model was superior  
353 to the combined segmentation model with respect to liver segmentation. Interpretation of such  
354 metrics of overlap, however, represents a major challenge in computer vision applications in  
355 medical domains such as dermatology and endoscopy<sup>27-29</sup> as well as non-medical domains such  
356 as autonomous driving<sup>30</sup>. In the specific use case of laparoscopic surgery, evidence suggests that  
357 such technical metrics alone are not sufficient to characterize the clinical potential and utility of  
358 segmentation algorithms.<sup>31,32</sup> In this context, the subjective clinical utility of a bounding box-based  
359 detection system recognizing the common bile duct and the cystic duct at average precisions of  
360 0.32 and 0.07, respectively, demonstrated by Tokuyasu *et al.*, supports this hypothesis.<sup>12</sup> In the  
361 presented analysis, the trained structure-specific and combined machine learning algorithms  
362 outperformed all human participants in the specific task of bounding box segmentation of the



363 pancreas except for two surgical specialists with over 10 years of experience. This suggests that  
364 even for structures such as the pancreas with seemingly poor segmentation quality (segmentation  
365 IoU of the best-performing model:  $0.28 \pm 0.27$  in the test set) have the potential to provide clinically  
366 valuable help in anatomy recognition. Notably, the best average IoUs achieved in this comparative  
367 study were 0.29 (for the structure-specific model) and 0.36 (for the best human participant), which  
368 would both be considered less reliable segmentation quality measures on paper. This encourages  
369 further discussion about metrics for segmentation quality assessment in clinical AI. In the future,  
370 the potential of the described dataset<sup>23</sup> and organ segmentation algorithms could be exploited for  
371 educational purposes<sup>33,34</sup>, for guidance systems facilitating real-time detection of risk and target  
372 structures<sup>19,32,35</sup>, or as an auxiliary function integrated in more complex surgical assistance  
373 systems, such as guidance systems relying on automated liver registration<sup>36</sup>.

374 The limitations of this work are mostly related to the dataset and general limitations of machine  
375 learning-based segmentation: First, the Dresden Surgical Anatomy Dataset is a monocentric  
376 dataset based on 32 robot-assisted rectal surgeries. Therefore, the images used for algorithm  
377 training and validation originate from one set of hardware and display organs from specific angles,  
378 which could limit generalizability and transferability of the presented findings to other centers and  
379 other minimally-invasive abdominal surgeries, particularly non-robotic procedures. Second,  
380 annotations were required for training of machine learning algorithms, potentially inducing some  
381 bias towards the way that organs were annotated in the algorithms, which may differ from  
382 individual healthcare professionals' way of recognizing an organ. This is particularly relevant for  
383 organs such as the ureters or the pancreas, which often appear covered by layers of tissue. Here,  
384 computer vision-based algorithms that solely consider the laparoscopic images provided by the  
385 Dresden Surgical Anatomy Dataset for identification of risk structures will only be able to identify  
386 an organ once it is visible. For an earlier recognition of such hidden risk structures, more training  
387 data with meaningful annotations would be necessary. Importantly, the presented comparison to  
388 human performance focused on segmentation of visible anatomy as well, neglecting that humans  
389 (and possibly computers, too) could already identify a risk structure hidden underneath layers of  
390 tissue. Third, the dataset only includes individual annotated images. In some structures such as  
391 the ureter, video data offers considerably more information than still image data. In this context, it  
392 is conceivable that an incorporation of temporal aspects could result in major improvements of  
393 both human and algorithm recognition performance. The existing limitations notwithstanding, the  
394 presented study represents an important addition to the growing body of research on medical  
395 image analysis in laparoscopic surgery, particularly by linking technical metrics to human  
396 performance.

397 In conclusion, this study demonstrates that machine learning methods have the potential to  
398 provide clinically relevant near-real-time assistance in anatomy recognition in minimally-invasive  
399 surgery. This study is the first to use the recently published Dresden Surgical Anatomy Dataset,  
400 providing baseline algorithms for organ segmentation and evaluating the clinical relevance of such  
401 algorithms by introducing more clinically meaningful comparators beyond classical computer  
402 vision metrics. Future research should investigate other segmentation methods, the transferability  
403 of these results to other surgical procedures, and the clinical impact of real-time surgical  
404 assistance systems and didactic applications based on automated segmentation algorithms.  
405

406 **ACKNOWLEDGMENTS**

407 ***Assistance with the study***

408 The authors gratefully acknowledge excellent project coordination by Dr. Elisabeth Fischermeier  
409 and Dr. Grit Krause-Jüttler.

410

411 ***Financial support and sponsorship***

412 This work has been funded by the Else Kröner Fresenius Center for Digital Health (EKFZ),  
413 Dresden, Germany (project “CoBot”), by the German Research Foundation DFG within the Cluster  
414 of Excellence EXC 2050: “Center for Tactile Internet with Human-in-the-Loop (CeTI)” (project  
415 number 390696704) and by the German Federal Ministry of Health (BMG) within the “Surgomics”  
416 project (grant number BMG 2520DAT82). Furthermore, FRK received funding from the Medical  
417 Faculty of the Technical University Dresden within the MedDrive Start program (grant number  
418 60487) and from the Joachim Herz Foundation (Add-On Fellowship for Interdisciplinary Life  
419 Science). FMR received a doctoral student scholarship from the *Carus Promotionskolleg* Dresden.

420

421 ***Conflicts of interest***

422 The authors declare no conflicts of interest.

423

424 ***Presentation***

425 None.

426

## 427 REFERENCES

- 428 1. Wang P, Liu X, Berzin TM, et al. Effect of a deep-learning computer-aided detection system  
429 on adenoma detection during colonoscopy (CADE-DB trial): a double-blind randomised  
430 study. *Lancet Gastroenterol Hepatol.* 2020;5(4):343-351. doi:10.1016/S2468-  
431 1253(19)30411-X
- 432 2. Wang P, Berzin TM, Glissen Brown JR, et al. Real-time automatic detection system  
433 increases colonoscopic polyp and adenoma detection rates: a prospective randomised  
434 controlled study. *Gut.* 2019;68(10):1813-1819. doi:10.1136/GUTJNL-2018-317500
- 435 3. Kather JN, Heij LR, Grabsch HI, et al. Pan-cancer image-based detection of clinically  
436 actionable genetic alterations. *Nat Cancer* 2020 18. 2020;1(8):789-799.  
437 doi:10.1038/s43018-020-0087-6
- 438 4. Esteva A, Kuprel B, Novoa RA, et al. Dermatologist-level classification of skin cancer with  
439 deep neural networks. *Nature.* 2017;542(7639):115-118. doi:10.1038/nature21056
- 440 5. Simillis C, Lal N, Thoukididou SN, et al. Open Versus Laparoscopic Versus Robotic Versus  
441 Transanal Mesorectal Excision for Rectal Cancer: A Systematic Review and Network Meta-  
442 analysis. *Ann Surg.* 2019;270(1):59-68. doi:10.1097/SLA.0000000000003227
- 443 6. Zhao JJ, Syn NL, Chong C, et al. Comparative outcomes of needlescopic, single-incision  
444 laparoscopic, standard laparoscopic, mini-laparotomy, and open cholecystectomy: A  
445 systematic review and network meta-analysis of 96 randomized controlled trials with 11,083  
446 patients. *Surgery.* 2021;170(4):994-1003. doi:10.1016/J.SURG.2021.04.004
- 447 7. Luketich JD, Pennathur A, Awais O, et al. Outcomes after minimally invasive  
448 esophagectomy: review of over 1000 patients. *Ann Surg.* 2012;256(1):95-103.  
449 doi:10.1097/SLA.0B013E3182590603
- 450 8. Thomson JE, Kruger D, Jann-Kruger C, et al. Laparoscopic versus open surgery for  
451 complicated appendicitis: a randomized controlled trial to prove safety. *Surg Endosc.*  
452 2015;29(7):2027-2032. doi:10.1007/S00464-014-3906-Y
- 453 9. Islam M, Atputharuban DA, Ramesh R, Ren H. Real-time instrument segmentation in  
454 robotic surgery using auxiliary supervised deep adversarial learning. *IEEE Robot Autom*  
455 *Lett.* 2019;4(2):2188-2195. doi:10.1109/LRA.2019.2900854
- 456 10. Roß T, Reinke A, Full PM, et al. Comparative validation of multi-instance instrument  
457 segmentation in endoscopy: results of the ROBUST-MIS 2019 challenge. *Med Image Anal.*  
458 2020;70:101920. doi:10.1016/j.media.2020.101920
- 459 11. Shvets AA, Rakhlin A, Kalinin AA, Iglovikov VI. Automatic Instrument Segmentation in  
460 Robot-Assisted Surgery using Deep Learning. In: *Proceedings - 17th IEEE International*  
461 *Conference on Machine Learning and Applications, ICMLA 2018.* Institute of Electrical and

- 462 Electronics Engineers Inc.; 2019:624-628. doi:10.1109/ICMLA.2018.00100
- 463 12. Tokuyasu T, Iwashita Y, Matsunobu Y, et al. Development of an artificial intelligence system  
464 using deep learning to indicate anatomical landmarks during laparoscopic  
465 cholecystectomy. *Surg Endosc* 2020 354. 2020;35(4):1651-1658. doi:10.1007/S00464-  
466 020-07548-X
- 467 13. Mascagni P, Vardazaryan A, Alapatt D, et al. Artificial Intelligence for Surgical Safety:  
468 Automatic Assessment of the Critical View of Safety in Laparoscopic Cholecystectomy  
469 Using Deep Learning. *Ann Surg*. Published online 2020.  
470 doi:10.1097/SLA.0000000000004351
- 471 14. Jin A, Yeung S, Jopling J, et al. Tool Detection and Operative Skill Assessment in Surgical  
472 Videos Using Region-Based Convolutional Neural Networks. *Proc - 2018 IEEE Winter Conf  
473 Appl Comput Vision, WACV 2018*. 2018;2018-January:691-699. Accessed July 14, 2021.  
474 <https://arxiv.org/abs/1802.08774v2>
- 475 15. Funke I, Bodenstedt S, Oehme F, von Bechtolsheim F, Weitz J, Speidel S. Using 3D  
476 Convolutional Neural Networks to Learn Spatiotemporal Features for Automatic Surgical  
477 Gesture Recognition in Video. *Med Image Comput Comput Assist Interv – MICCAI 2019  
478 Lect Notes Comput Sci*. 2019;11768:467-475. doi:10.1007/978-3-030-32254-  
479 0\_52/TABLES/2
- 480 16. Lavanchy JL, Zindel J, Kirtac K, et al. Automation of surgical skill assessment using a three-  
481 stage machine learning algorithm. *Sci Reports* 2021 111. 2021;11(1):1-9.  
482 doi:10.1038/s41598-021-84295-6
- 483 17. Maier-Hein L, Eisenmann M, Sarikaya D, et al. Surgical data science – from concepts  
484 toward clinical translation. *Med Image Anal*. 2022;76:102306.  
485 doi:10.1016/J.MEDIA.2021.102306
- 486 18. Kolbinger FR, Leger S, Carstens M, et al. Artificial Intelligence for context-aware surgical  
487 guidance in complex robot-assisted oncological procedures: an exploratory feasibility  
488 study. *medRxiv*. Published online May 3, 2022:2022.05.02.22274561.  
489 doi:10.1101/2022.05.02.22274561
- 490 19. Madani A, Namazi B, Altieri MS, et al. Artificial Intelligence for Intraoperative Guidance. *Ann  
491 Surg*. Published online 2020. doi:10.1097/sla.0000000000004594
- 492 20. Fecso AB, Szasz P, Kerezov G, Grantcharov TP. The effect of technical performance on  
493 patient outcomes in surgery. *Ann Surg*. 2017;265(3):492-501.  
494 doi:10.1097/SLA.0000000000001959
- 495 21. Mazzocco K, Petitti DB, Fong KT, et al. Surgical team behaviors and patient outcomes. *Am  
496 J Surg*. 2009;197(5):678-685. doi:10.1016/J.AMJSURG.2008.03.002

- 497 22. Suliburk JW, Buck QM, Pirko CJ, et al. Analysis of Human Performance Deficiencies  
498 Associated With Surgical Adverse Events. *JAMA Netw Open*. 2019;2(7):e198067-e198067.  
499 doi:10.1001/JAMANETWORKOPEN.2019.8067
- 500 23. Carstens M, Rinner FM, Bodenstedt S, et al. The Dresden Surgical Anatomy Dataset for  
501 Abdominal Organ Segmentation in Surgical Data Science. *Sci Data*. 2023;10(1):1-8.  
502 doi:10.1038/s41597-022-01719-2
- 503 24. Chen L-C, Papandreou G, Schroff F, Adam H. Rethinking Atrous Convolution for Semantic  
504 Image Segmentation. *arXiv*. Published online June 17, 2017.  
505 doi:10.48550/arxiv.1706.05587
- 506 25. Lin TY, Maire M, Belongie S, et al. Microsoft COCO: Common Objects in Context. *Lect*  
507 *Notes Comput Sci (including Subser Lect Notes Artif Intell Lect Notes Bioinformatics)*.  
508 2014;8693 LNCS(PART 5):740-755. doi:10.48550/arxiv.1405.0312
- 509 26. Loshchilov I, Hutter F. Decoupled Weight Decay Regularization. *7th Int Conf Learn*  
510 *Represent ICLR 2019*. Published online November 14, 2017.  
511 doi:10.48550/arxiv.1711.05101
- 512 27. Renard F, Guedria S, Palma N De, Vuillerme N. Variability and reproducibility in deep  
513 learning for medical image segmentation. *Sci Rep*. 2020;10(1):1-16. doi:10.1038/s41598-  
514 020-69920-0
- 515 28. Powers DMW, Ailab. Evaluation: from precision, recall and F-measure to ROC,  
516 informedness, markedness and correlation. *arXiv*. Published online October 11, 2020.  
517 doi:10.48550/arxiv.2010.16061
- 518 29. Parikh RB, Teeple S, Navathe AS. Addressing Bias in Artificial Intelligence in Health Care.  
519 *JAMA*. 2019;322(24):2377-2378. doi:10.1001/JAMA.2019.18058
- 520 30. Zhang Y, Mehta S, Caspi A. Rethinking Semantic Segmentation Evaluation for  
521 Explainability and Model Selection. Published online January 21, 2021. Accessed July 27,  
522 2021. <https://arxiv.org/abs/2101.08418v1>
- 523 31. Reinke A, Tizabi MD, Sudre CH, et al. Common Limitations of Image Processing Metrics:  
524 A Picture Story. *arXiv*. Published online April 12, 2021. doi:10.48550/arxiv.2104.05642
- 525 32. Hashimoto DA, Rosman G, Witkowski ER, et al. Computer Vision Analysis of Intraoperative  
526 Video: Automated Recognition of Operative Steps in Laparoscopic Sleeve Gastrectomy.  
527 *Ann Surg*. 2019;270(3):414-421. doi:10.1097/SLA.0000000000003460
- 528 33. Hu YY, Mazer LM, Yule SJ, et al. Complementing Operating Room Teaching With Video-  
529 Based Coaching. *JAMA Surg*. 2017;152(4):318-325. doi:10.1001/JAMASURG.2016.4619
- 530 34. Mizota T, Anton NE, Stefanidis D. Surgeons see anatomical structures faster and more  
531 accurately compared to novices: Development of a pattern recognition skill assessment



- 532 platform. *Am J Surg*. 2019;217(2):222-227. doi:10.1016/J.AMJSURG.2018.10.011
- 533 35. Ward TM, Mascagni P, Ban Y, et al. Computer vision in surgery. *Surgery*.  
534 2021;169(5):1253-1256. doi:10.1016/J.SURG.2020.10.039
- 535 36. Docea R, Pfeiffer M, Bodenstedt S, et al. Simultaneous localisation and mapping for  
536 laparoscopic liver navigation : a comparative evaluation study. In: Linte CA, Siewerdsen JH,  
537 eds. *Medical Imaging 2021: Image-Guided Procedures, Robotic Interventions, and*  
538 *Modeling*. Vol 11598. SPIE; 2021:8. doi:10.1117/12.2582121
- 539

540 **ABBREVIATIONS**

|     |     |                         |
|-----|-----|-------------------------|
| 541 | AI  | Artificial Intelligence |
| 542 | IoU | Intersection-over-Union |
| 543 | SD  | Standard deviation      |

544

545 **AUTHOR CONTRIBUTIONS**

546 FRK, JW, MD, SS, and SB conceptualized the study. FRK, FMR, and MC collected and annotated  
547 clinical and video data and contributed to data analysis. ACJ, SL, and SB implemented and trained  
548 the neural networks and contributed to data analysis. JW, MD, and SS supervised the project,  
549 provided infrastructure and gave important scientific input. FRK drafted the initial manuscript text.  
550 All authors reviewed, edited, and approved the final manuscript.

551
